# Supplementary material for: Temporal Trend of Serum Perfluorooctanoic Acid and Perfluorooctane Sulfonic Acid among U.S. Adults with or without Comorbidities in NHANES 1999–2018
Source: MDPI journal article supplement (doi:10.3390/toxics12050314), 2024-04-26
Supplement: s1 [file s1]

## Supplementary Material

### Temporal trend of serum perfluorooctanoic acid and perfluorooctane sulfonic acid among the

#### U.S. adults with or without comorbidities in NHANES 1999-2018

**Jinhua Pan <sup>1</sup>, Changping Ouyang <sup>1</sup>, Shengze Zhou <sup>1</sup>, Xuemei Wang <sup>1</sup>, Heming Liu <sup>1</sup>,  
Jia Zhang <sup>1</sup>, Xiao Wang <sup>1</sup>, Xiaoru Shi <sup>1</sup>, Aimin Yang <sup>2,3,\*</sup> and Xiaobin Hu <sup>1,\*</sup>**

<sup>1</sup> Institute of Epidemiology and Health Statistics, School of Public Health, Lanzhou University, Lanzhou 730000, China; panjh2017@lzu.edu.cn (J.P.); ouyangchp@163.com (C.O.); 220220913251@lzu.edu.cn (S.Z.); 220220912900@lzu.edu.cn (X.W.); 220220912581@lzu.edu.cn (H.L.); jzhang21@lzu.edu.cn (J.Z.); wangxiao21@lzu.edu.cn (X.W.); shixr2018@lzu.edu.cn (X.S.)

<sup>2</sup> Department of Medicine and Therapeutics, The Chinese University of Hong Kong, Prince of Wales Hospital, Hong Kong 999077, China

<sup>3</sup> Hong Kong Institute of Diabetes and Obesity, The Chinese University of Hong Kong, Prince of Wales Hospital, Hong Kong 999077, China

\* Correspondence: huxiaobin@lzu.edu.cn (X.H.); aiminyang@cuhk.edu.hk (A.Y.)

**Supplementary Table S1.** Summary of limit of detection (ng/mL) and detection rates for Per- and Polyfluoroalkyl Substances

| Chemicals | 1999-2000 |         | 2003-2004 |         | 2005-2006 |         | 2007-2008 |         | 2009-2010 |         | 2011-2012 |         | 2013-2014 |         | 2015-2016 |         | 2017-2018 |         |
|-----------|-----------|---------|-----------|---------|-----------|---------|-----------|---------|-----------|---------|-----------|---------|-----------|---------|-----------|---------|-----------|---------|
|           | LOD       | ≥LOD(%) |
| PFOA      | 0.1       | 99.9    | 0.1       | 99.6    | 0.1       | 99.6    | 0.1       | 99.9    | 0.1       | 99.8    | 0.1       | 99.5    | -         | -       | -         | -       |           |         |
| PFOS      | 0.2       | 100.0   | 0.4       | 99.9    | 0.2       | 99.9    | 0.2       | 99.9    | 0.2       | 99.8    | 0.2       | 99.6    | -         | -       | -         | -       |           |         |
| PFHxS     | 0.1       | 99.7    | 0.3       | 97.7    | 0.1       | 95.9    | 0.1       | 99.2    | 0.1       | 99.4    | 0.1       | 98.4    | 0.1       | 98.8    | 0.1       | 98.4    | 0.1       | 99.3    |
| EPAH      | 0.2       | 92.9    | 0.4       | 3.8     | 0.2       | 6.2     | 0.2       | 3.4     | 0.1       | 5.5     | 0.1       | 5.1     | -         | -       | -         | -       | -         |         |
| MPAH      | 0.17      | 97.5    | 0.52      | 24.1    | 0.2       | 82.5    | 0.2       | 69.5    | 0.1       | 75.9    | 0.09      | 53.9    | 0.1       | 44.5    | 0.1       |         | 0.1       | 59.0    |
| PFDE      | 0.2       | 30.1    | 0.3       | 27.2    | 0.2       | 76.6    | 0.2       | 68.2    | 0.1       | 94.6    | 0.1       | 85.1    | 0.1       | 79.0    | 0.1       | 66.1    | 0.1       | 88.7    |
| PFBS      | -         |         | 0.4       | 0.3     | 0.1       | 7.9     | 0.1       | 0.9     | 0.1       | 0.9     | 0.1       | 1.2     | 0.1       | 0.7     | -         | -       | -         |         |
| PFHP      | 0.4       | 14.1    | 0.3       | 7.6     | 0.4       | 9.5     | 0.4       | 7.6     | 0.1       | 20.5    | 0.1       | 20.1    | 0.1       | 12.5    | -         | -       | -         |         |
| PFNA      | 0.1       | 95.9    | 0.1       | 98.3    | 0.1       | 99.1    | 0.082     | 99.5    | 0.082     | 99.8    | 0.08      | 99.3    | 0.1       | 98.8    | 0.1       | 98.7    | 0.1       | 92.5    |
| PFSA      | 0.05      | 97.7    | 0.2       | 21.2    | 0.1       | 27.3    | 0.1       | 0.6     | 0.1       | 0.1     | 0.1       | 0.8     | -         | -       | -         | -       | -         |         |
| PFUA      | 0.2       | 14.8    | 0.3       | 8.3     | 0.2       | 31.0    | 0.2       | 29.9    | 0.1       | 69.6    | 0.1       | 62.4    | 0.1       | 43.5    | 0.1       | 37.7    | 0.1       | 66.0    |
| PFDO      | 0.2       | 0.8     | 1         | 0.0     | 0.2       | 2.1     | 0.2       | 2.4     | 0.1       | 5.1     | 0.1       | 9.4     | 0.1       | 16.9    | 0.1       | 2.3     | -         |         |
| n-PFOA    | -         | -       | -         | -       | -         | -       | -         | -       | -         | -       | -         | -       | 0.1       | 99.1    | 0.1       | 99.2    | 0.1       | 99.6    |
| Sb-PFOA   | -         | -       | -         | -       | -         | -       | -         | -       | -         | -       | -         | -       | 0.1       | 18.7    | 0.1       | 2.0     | 0.1       | 10.0    |
| n-PFOS    | -         | -       | -         | -       | -         | -       | -         | -       | -         | -       | -         | -       | 0.1       | 99.0    | 0.1       | 99.4    | 0.1       | 99.7    |
| Sm-PFOS   | -         | -       | -         | -       | -         | -       | -         | -       | -         | -       | -         | -       | 0.1       | 98.3    | 0.1       | 98.8    | 0.1       | 99.2    |

**Supplementary Table S2.** The standardized GM of PFOA (ng/mL) in NHANES 1999-2000 to 2017-2018

| Group          | 1999-2000       | 2003-2004       | 2005-2006       | 2007-2008       | 2009-2010         | 2011-2012       | 2013-2014       | 2015-2016       | 2017-2018       |
|----------------|-----------------|-----------------|-----------------|-----------------|-------------------|-----------------|-----------------|-----------------|-----------------|
| Overall        | 4.5(4.41, 4.64) | 3.6(3.51, 3.68) | 3.7(3.60, 3.82) | 4.1(3.99, 4.15) | 3.0(2.90, 3.02)   | 2.1(2.03, 2.13) | 1.9(1.90, 2.20) | 1.6(1.56, 1.65) | 1.4(1.38, 1.45) |
| Sex            |                 |                 |                 |                 |                   |                 |                 |                 |                 |
| Male           | 5.0(4.84, 5.08) | 4.1(3.99, 4.12) | 4.4(4.37, 4.44) | 4.7(4.67, 4.70) | 3.4(3.39, 3.42)   | 2.3(2.33, 2.35) | 2.2(2.20, 2.24) | 1.8(1.82, 1.84) | 1.6(1.59, 1.62) |
| Female         | 4.1(4.07, 4.17) | 3.2(3.11, 3.23) | 3.1(2.97, 3.15) | 3.5(3.43, 3.56) | 2.5(2.50, 2.60)   | 1.8(1.79, 1.89) | 1.7(1.64, 1.75) | 1.4(1.35, 1.44) | 1.2(1.21, 1.28) |
| Smoke          |                 |                 |                 |                 |                   |                 |                 |                 |                 |
| Never          | 4.5(4.26, 4.66) | 3.6(3.46, 3.70) | 3.6(3.46, 3.77) | 4.1(3.94, 4.19) | 2.9(2.85, 3.04)   | 2.1(2.03, 2.15) | 2.0(1.89, 2.06) | 1.7(1.60, 1.73) | 1.4(1.40, 1.49) |
| Former         | 4.5(4.28, 4.69) | 3.7(3.48, 3.86) | 3.7(3.45, 3.87) | 4.1(3.91, 4.22) | 3.1(2.92, 3.19)   | 2.2(2.13, 2.34) | 2.0(1.86, 2.10) | 1.7(1.61, 1.74) | 1.4(1.29, 1.43) |
| Current        | 4.8(4.59, 5.11) | 3.5(3.31, 3.67) | 4.2(3.97, 4.51) | 4.3(4.13, 4.46) | 3.1(2.97, 3.23)   | 1.9(1.81, 2.04) | 1.9(1.83, 2.70) | 1.5(1.36, 1.55) | 1.4(1.31, 1.52) |
| DM             |                 |                 |                 |                 |                   |                 |                 |                 |                 |
| No             | 4.7(4.55, 4.79) | 3.7(3.59, 3.78) | 3.9(3.75, 4.50) | 4.1(4.02, 4.20) | 3.0(2.95, 3.09)   | 2.2(2.12, 2.23) | 2.0(1.98, 2.11) | 1.7(1.63, 1.74) | 1.5(1.41, 1.50) |
| Yes            | 4.1(3.77, 4.51) | 3.3(3.16, 3.54) | 2.8(2.54, 3.01) | 4.0(3.77, 4.16) | 2.8(2.67, 2.91)   | 1.7(1.59, 1.83) | 1.7(1.59, 1.82) | 1.4(1.27, 1.47) | 1.3(1.20, 1.36) |
| CKD            |                 |                 |                 |                 |                   |                 |                 |                 |                 |
| No             | 4.6(4.51, 4.77) | 3.7(3.57, 3.78) | 3.9(3.76, 4.04) | 4.2(4.09, 4.28) | 3.1(2.99, 3.15)   | 2.2(2.14, 2.26) | 2.0(1.96, 2.09) | 1.7(1.61, 1.72) | 1.4(1.37, 1.45) |
| Yes            | 4.1(3.78, 4.41) | 2.9(2.76, 3.04) | 2.9(2.74, 3.13) | 3.8(3.58, 3.93) | 2.4(2.28, 2.61)   | 1.6(1.49, 1.71) | 1.6(1.54, 1.74) | 1.3(1.21, 1.42) | 1.1(0.96, 1.23) |
| Hyperlipidemia |                 |                 |                 |                 |                   |                 |                 |                 |                 |
| No             | 4.3(4.02, 4.58) | 3.4(3.26, 3.53) | 3.6(3.44, 3.84) | 4.1(3.92, 4.20) | 2.9(2.84, 3.03)   | 2.1(2.00, 2.13) | 2.0(1.93, 2.10) | 1.6(1.58, 1.72) | 1.5(1.44, 1.54) |
| Yes            | 4.6(4.44, 4.69) | 3.6(3.53, 3.75) | 3.7(3.57, 3.85) | 4.1(3.95, 4.16) | 3.0(2.89, 3.05)   | 2.1(2.00, 2.14) | 1.9(1.83, 1.98) | 1.6(1.49, 1.62) | 1.4(1.30, 1.41) |
| Any CVD        |                 |                 |                 |                 |                   |                 |                 |                 |                 |
| No             | 4.5(4.43, 4.67) | 3.6(3.49, 3.67) | 3.8(3.64, 3.87) | 4.1(4.02, 4.19) | 3.0(2.90, 3.03)   | 2.1(2.04, 2.14) | 2.0(1.92, 2.04) | 1.6(1.59, 1.69) | 1.4(1.39, 1.46) |
| Yes            | 5.0(4.10, 5.98) | 3.7(3.56, 3.94) | 3.2(2.97, 3.45) | 4.1(3.37, 4.74) | 3.1(2.99, 3.28)   | 1.9(1.55, 2.19) | 1.9(1.67, 2.06) | 1.3(1.16, 1.44) | 1.2(1.05, 1.33) |
| Cancer         |                 |                 |                 |                 |                   |                 |                 |                 |                 |
| No             | 4.5(4.36, 4.60) | 3.6(3.50, 3.67) | 3.6(3.53, 3.76) | 4.1(3.98, 4.16) | 3.0(2.89, 3.02)   | 2.1(2.05, 2.16) | 1.9(1.87, 1.98) | 1.6(1.54, 1.63) | 1.4(1.39, 1.47) |
| Yes            | 5.4(4.83, 5.92) | 4.1(3.65, 4.56) | 4.1(3.82, 4.48) | 3.8(3.55, 3.99) | 3.0(2.808, 3.103) | 2.0(1.81, 2.22) | 2.4(2.16, 2.63) | 1.7(1.51, 1.81) | 1.2(1.07, 1.37) |

**Supplementary Table S3.** The standardized GM of PFOS (ng/mL) in NHANES 1999-2000 to 2017-2018

| Group          | 1999-2000          | 2003-2004         | 2005-2006         | 2007-2008         | 2009-2010         | 2011-2012        | 2013-2014      | 2015-2016      | 2017-2018      |
|----------------|--------------------|-------------------|-------------------|-------------------|-------------------|------------------|----------------|----------------|----------------|
| Overall        | 28.7(27.98,29.36)  | 20.2(19.74,20.65) | 17.8(17.18,18.43) | 14.3(13.80,14.78) | 9.9(9.54,10.26)   | 7.3(7.016,7.573) | 4.0(3.82,4.10) | 5.8(5.52,6.07) | 5.0(4.81,5.28) |
| Sex            |                    |                   |                   |                   |                   |                  |                |                |                |
| Male           | 31.9(31.60,32.22)  | 22.9(22.70,23.03) | 21.3(20.93,21.70) | 17.7(17.40,18.00) | 12.1(11.86,12.39) | 8.9(8.692,9.040) | 4.8(4.64,4.87) | 7.3(7.10,7.52) | 6.2(6.03,6.42) |
| Female         | 25.7(25.06,26.27)  | 17.7(17.28,18.16) | 14.5(14.30,15.08) | 11.1(10.78,11.47) | 7.8(7.54,8.13)    | 5.8(5.588,6.077) | 3.2(3.12,3.33) | 4.4(4.16,4.61) | 3.9(3.76,4.14) |
| Smoke          |                    |                   |                   |                   |                   |                  |                |                |                |
| Never          | 29.3(28.037,30.57) | 20.7(20.00,21.43) | 17.7(16.86,18.55) | 15.3(14.49,16.05) | 10.0(9.48,10.53)  | 7.5(7.11,7.82)   | 4.3(4.04,4.47) | 6.1(5.70,6.48) | 5.3(4.96,5.58) |
| Former         | 28.4(27.51,29.21)  | 20.2(19.06,21.24) | 17.6(16.40,18.85) | 13.5(12.36,14.54) | 10.0(9.31,10.77)  | 7.7(7.06,8.29)   | 4.0(3.70,4.37) | 5.6(5.04,6.13) | 4.7(4.21,5.15) |
| Current        | 29.3(27.34,31.32)  | 19.6(18.77,20.43) | 18.9(17.32,20.53) | 14.4(13.08,15.64) | 9.9(9.11,10.68)   | 6.1(5.48,6.76)   | 3.3(3.01,3.50) | 5.4(4.68,6.08) | 4.9(4.23,5.47) |
| DM             |                    |                   |                   |                   |                   |                  |                |                |                |
| No             | 29.3(28.52,30.15)  | 20.3(19.78,20.79) | 18.4(17.65,19.06) | 14.3(13.77,14.84) | 9.9(9.52,10.34)   | 7.6(7.21,7.90)   | 4.1(3.92,4.27) | 6.0(5.65,6.31) | 5.2(4.90,5.47) |
| Yes            | 27.1(25.27,28.92)  | 19.7(18.71,20.74) | 15.1(13.35,16.92) | 14.2(12.94,15.48) | 10.1(9.33,10.79)  | 6.5(6.00,7.05)   | 3.6(3.23,3.96) | 5.2(4.58,5.79) | 4.5(3.97,5.03) |
| CKD            |                    |                   |                   |                   |                   |                  |                |                |                |
| No             | 29.9(28.95,30.94)  | 20.9(20.31,21.52) | 19.2(18.26,20.06) | 14.9(14.29,15.46) | 10.5(10.02,11.20) | 8.0(7.64,8.41)   | 4.3(4.10,4.49) | 6.0(5.66,6.33) | 5.3(4.98,5.55) |
| Yes            | 26.4(25.22,27.56)  | 18.6(17.43,19.81) | 15.0(13.97,16.09) | 13.7(12.54,14.86) | 8.5(7.94,9.02)    | 5.6(5.12,6.11)   | 3.2(2.96,3.37) | 4.8(4.29,5.32) | 3.4(2.89,3.92) |
| Hyperlipidemia |                    |                   |                   |                   |                   |                  |                |                |                |
| No             | 28.4(26.47,30.30)  | 19.5(18.96,20.12) | 17.8(16.69,18.95) | 14.3(13.58,15.08) | 10.3(9.69,10.92)  | 7.3(6.88,7.78)   | 3.9(3.75,4.06) | 6.1(5.62,6.49) | 5.2(4.85,5.52) |
| Yes            | 28.6(27.86,29.38)  | 20.4(19.79,21.02) | 17.8(17.01,18.51) | 14.2(13.52,14.84) | 9.6(9.15,10.08)   | 7.2(6.85,7.61)   | 3.9(3.71,4.17) | 5.6(5.21,5.96) | 4.9(4.58,5.25) |
| Any CVD        |                    |                   |                   |                   |                   |                  |                |                |                |
| No             | 28.9(28.13,29.62)  | 20.0(19.53,20.47) | 18.2(17.52,18.88) | 14.4(13.88,14.89) | 9.9(9.51,10.28)   | 7.2(6.93,7.46)   | 4.0(3.84,4.15) | 5.9(5.59,6.20) | 5.1(4.83,5.33) |
| Yes            | 29.9(26.96,32.76)  | 23.6(22.16,25.12) | 17.0(15.31,18.62) | 13.0(10.53,15.37) | 10.7(9.45,11.87)  | 8.0(6.11,9.84)   | 3.9(3.15,4.56) | 5.9(5.37,6.37) | 4.3(3.43,5.15) |
| Cancer         |                    |                   |                   |                   |                   |                  |                |                |                |
| No             | 28.6(27.90,29.32)  | 20.1(19.62,20.59) | 17.8(17.16,18.53) | 14.3(13.80,14.81) | 9.9(9.51,10.29)   | 7.3(7.04,7.63)   | 4.1(3.90,4.24) | 5.7(5.42,5.97) | 5.1(4.86,5.36) |
| Yes            | 29.2(25.08,33.31)  | 23.0(21.53,24.45) | 17.3(15.37,19.22) | 13.3(11.54,15.08) | 10.2(9.13,11.35)  | 7.5(6.07,8.98)   | 3.7(3.30,4.06) | 5.8(4.59,6.96) | 4.5(3.79,5.30) |

**Supplementary Table S4.** Pairwise comparison of trends in serum PFOA and PFOS levels grouped by sociodemographic characteristics and comorbidities

| Cohort 1               | Cohort 2                       | Numerator<br>Degrees of Freedom | Denominator<br>Degrees of Freedom | Number of<br>Permutations | P-Value | Significance<br>Level~ |
|------------------------|--------------------------------|---------------------------------|-----------------------------------|---------------------------|---------|------------------------|
| Serum PFOA analysis    |                                |                                 |                                   |                           |         |                        |
| Diabetes               | Without diabetes               | 4                               | 10                                | 4500                      | 0.012   | Rejected               |
| Chronic kidney disease | Without chronic kidney disease | 4                               | 10                                | 4500                      | 0.002   | Rejected               |
| hyperlipidemia         | Without hyperlipidemia         | 6                               | 6                                 | 4500                      | 0.108   | Failed to reject       |
| Cardiovascular disease | Without cardiovascular disease | 4                               | 10                                | 4500                      | 0.598   | Failed to reject       |
| Cancer                 | Without cancer                 | 4                               | 10                                | 4500                      | 0.745   | Failed to reject       |
| Serum PFOS analysis    |                                |                                 |                                   |                           |         |                        |
| Diabetes               | Without diabetes               | 6                               | 6                                 | 4500                      | 0.035   | Rejected               |
| Chronic kidney disease | Without chronic kidney disease | 6                               | 6                                 | 4500                      | 0.002   | Rejected               |
| hyperlipidemia         | Without hyperlipidemia         | 6                               | 6                                 | 4500                      | 0.237   | Failed to reject       |
| Cardiovascular disease | Without cardiovascular disease | 6                               | 6                                 | 4500                      | 0.651   | Failed to reject       |
| Cancer                 | Without cancer                 | 6                               | 6                                 | 4500                      | 0.236   | Failed to reject       |

### Laboratory Quality Control Measures

1. The NHANES quality assurance and quality control (QA/QC) protocols meet the 1988 Clinical Laboratory Improvement Act mandates.

Laboratory team performance is monitored using several techniques. NCHS and contract consultants use a structured competency assessment evaluation during visits to evaluate both the quality of the laboratory work and the quality-control procedures. Each laboratory staff member is observed for equipment operation, specimen collection and preparation; testing procedures and constructive feedback are given to each staff member. Formal retraining sessions are conducted annually to ensure that required skill levels were maintained.

2. NHANES uses several methods to monitor the quality of the analyses performed by the contract laboratories. In the MEC, these methods include performing blind split samples collected on “dry run” sessions. In addition, contract laboratories randomly perform repeat testing of all specimens. The repeat test rates were summarized in **Supplementary Table S5**.

3. NCHS developed and distributed a quality control protocol for all CDC and contract laboratories, which outlined the Westgard rules (Westgard, et al. 1981) used when running NHANES specimens. Progress reports containing any problems encountered during shipping or receipt of specimens, summary statistics for each control pool, QC graphs, instrument calibration, reagents, and any special considerations are submitted to NCHS quarterly. The reports are reviewed for trends or shifts in the data. The laboratories are required to explain any identified areas of concern.

4. All QC procedures recommended by the manufacturers were followed. Reported results for all assays meet the Division of Laboratory Science's quality control and quality assurance performance criteria for accuracy and precision, similar to specifications outlined by Westgard.

**Detailed QA/QC instructions are discussed in the NHANES Laboratory Procedures Manual (LPM).**

**Supplementary Table S5.** The repeat test rates of specimens in NHANES 1999-2000 to 2017-2018.

[illegible]
